# Supplementary material
Source: PubMed Central journal article supplement (PMC6602352)
Supplement: develop-146-180398-s1.pdf [file develop-146-180398-s1.pdf]

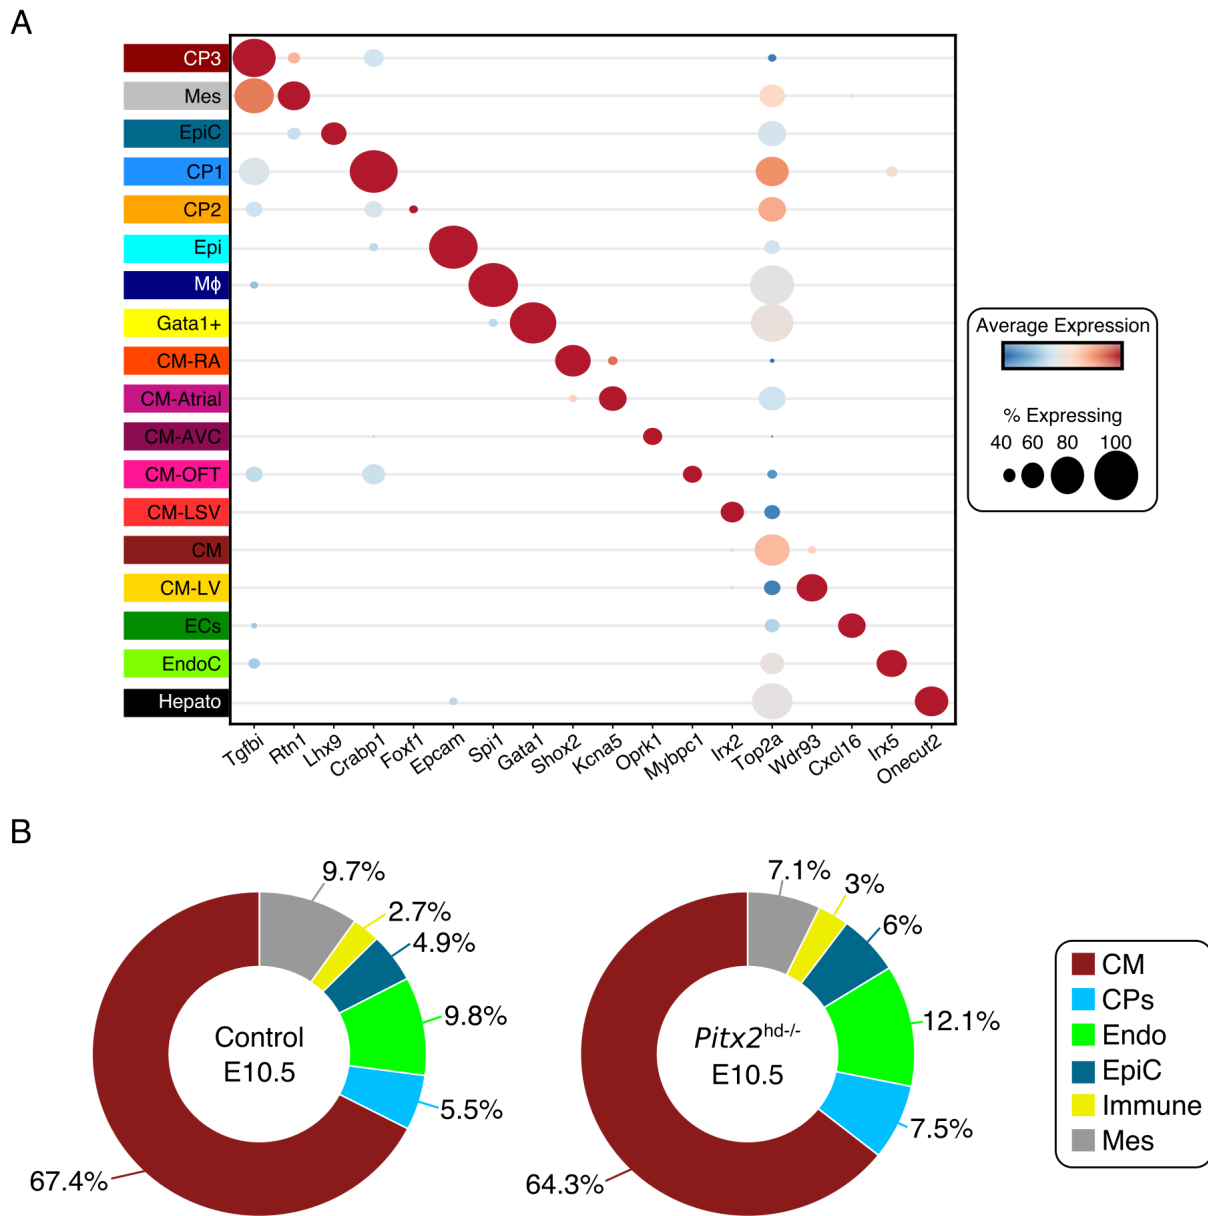

**Figure S1. Related to Fig. 1, E10.5 Cardiac Cell Composition.**

- A. Dotplot showing the expression of individual marker genes across the distinct E10.5 clusters.
- B. Donut plots displaying the cell composition by major cell type at E10.5.

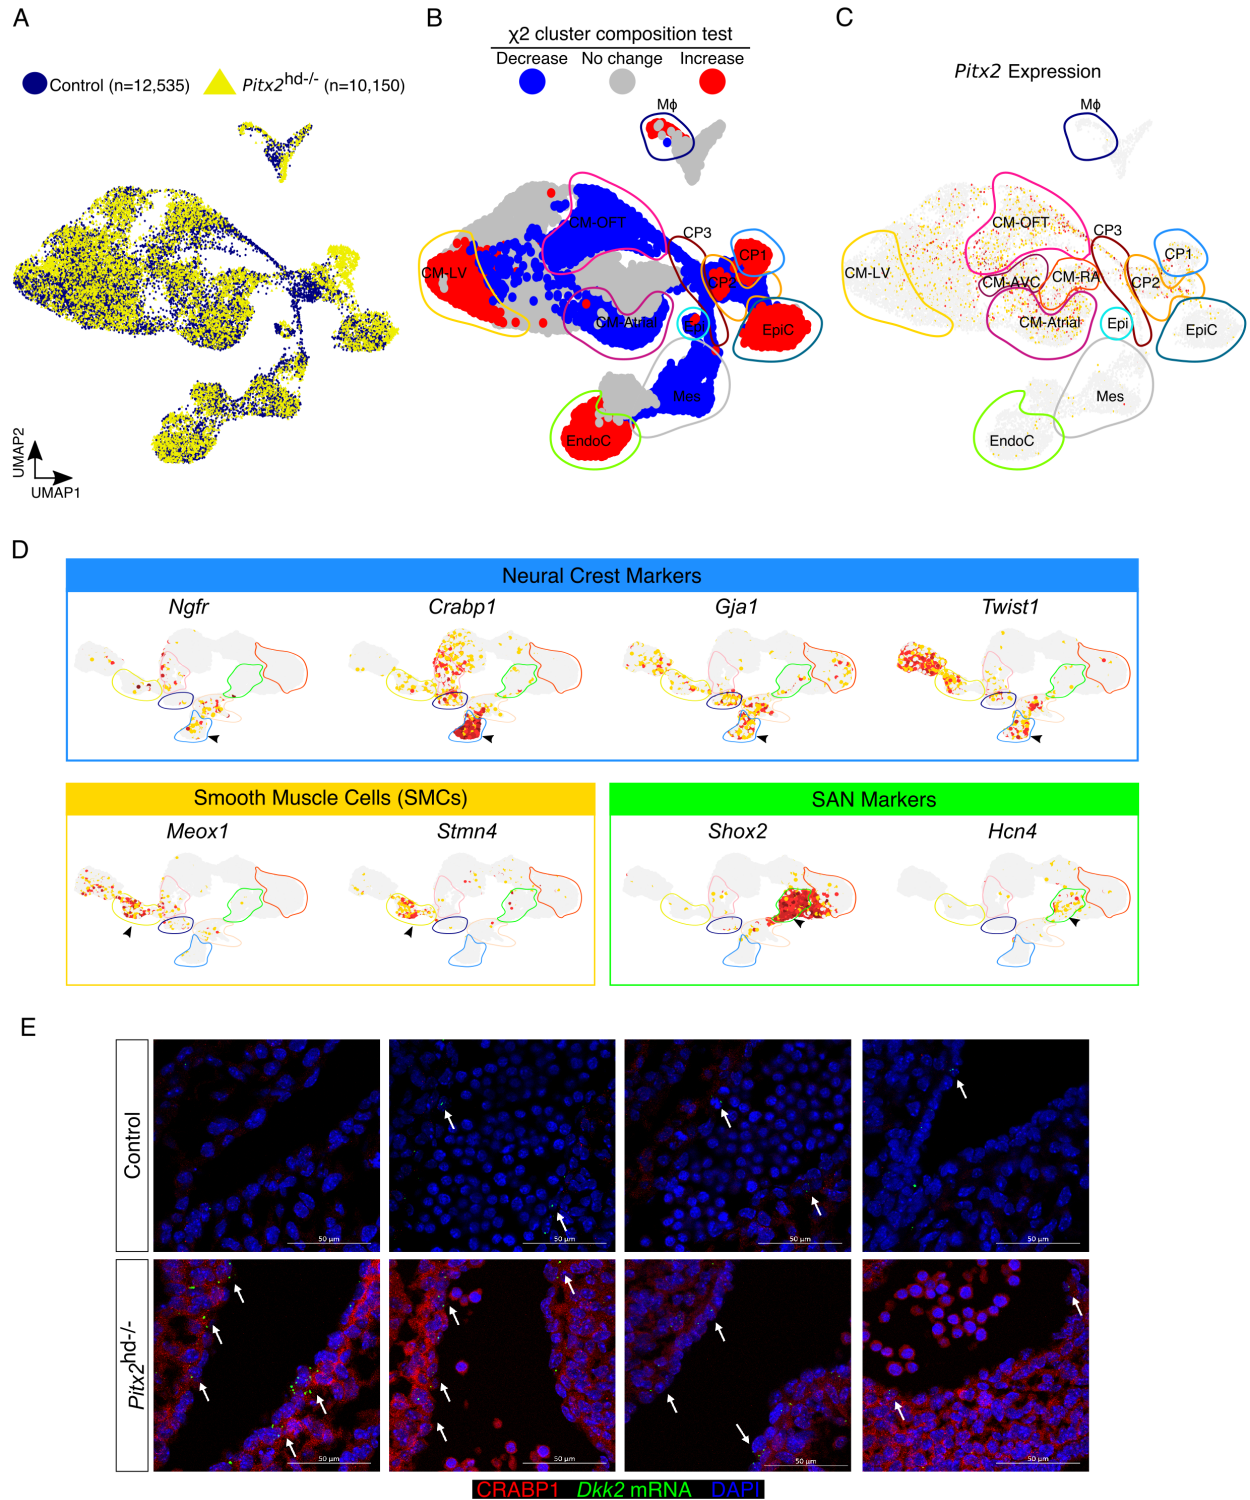

## Figure S2. Related to Fig. 2, Markers for Cardiac Progenitor Cell Populations.

- A. UMAP projection of E10.5 scRNA-seq data colored according to genotype. Control cells are colored blue, and *Pitx2*-null cells are colored maize.
- B.  $\chi^2$  cluster composition analysis of E10.5 *Pitx2*-null cardiac tissue compared to control. Blue, cluster that significantly decreases in *Pitx2*-null hearts. Red, cluster that significantly increased in *Pitx2*-null hearts. Gray, no significant change in cluster composition between control and *Pitx2*-null conditions.
- C. UMAP feature plot displaying *Pitx2* gene expression at E10.5.
- D. UMAP feature plots for indicated genes. Highlighted clusters are colored according to **Fig. 2D**. High expression is denoted in red, and low or zero expression is shown in grey.
- E. Additional images from CRABP1 IF (red), and *Dkk2* FISH (green) co-labelling experiments.

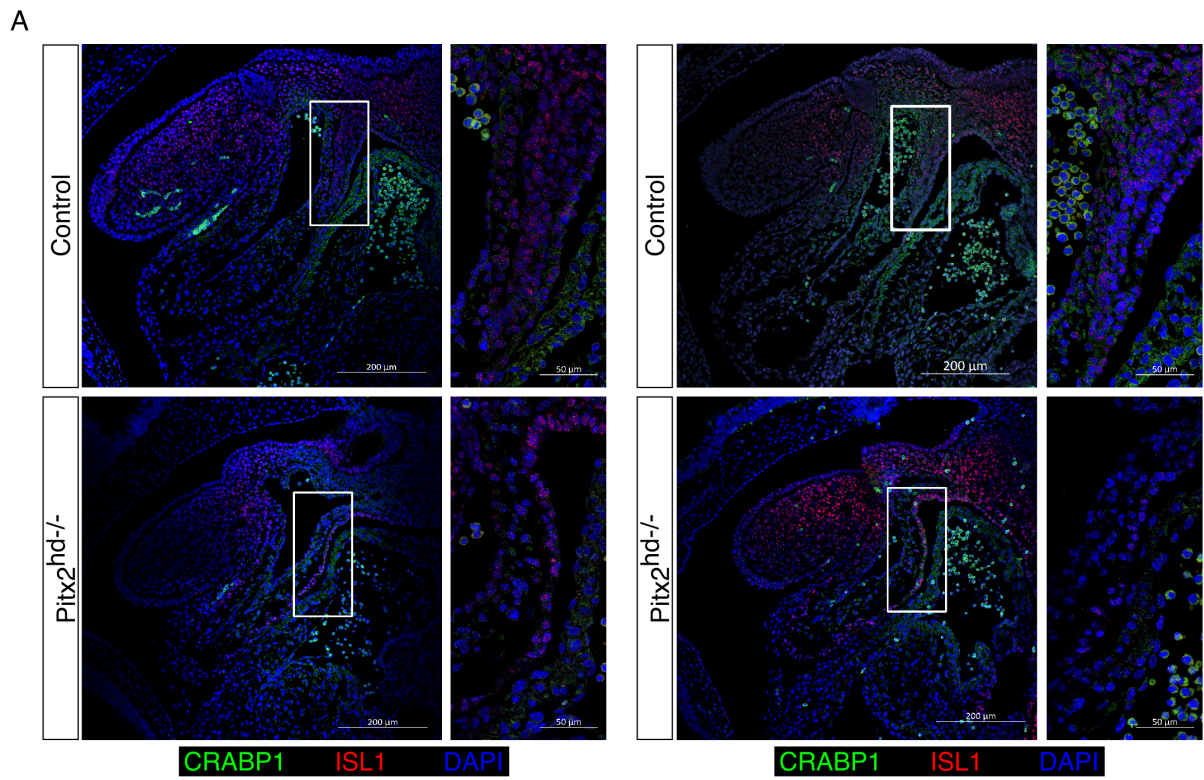

**Figure S3. Related to Figure 2, Decreased ISL1 Positive Progenitors in *Pitx2*-deficient Outflow Tract.**

A. ISL1 and CRABP1 IF co-labelling experiments in the outflow tract.

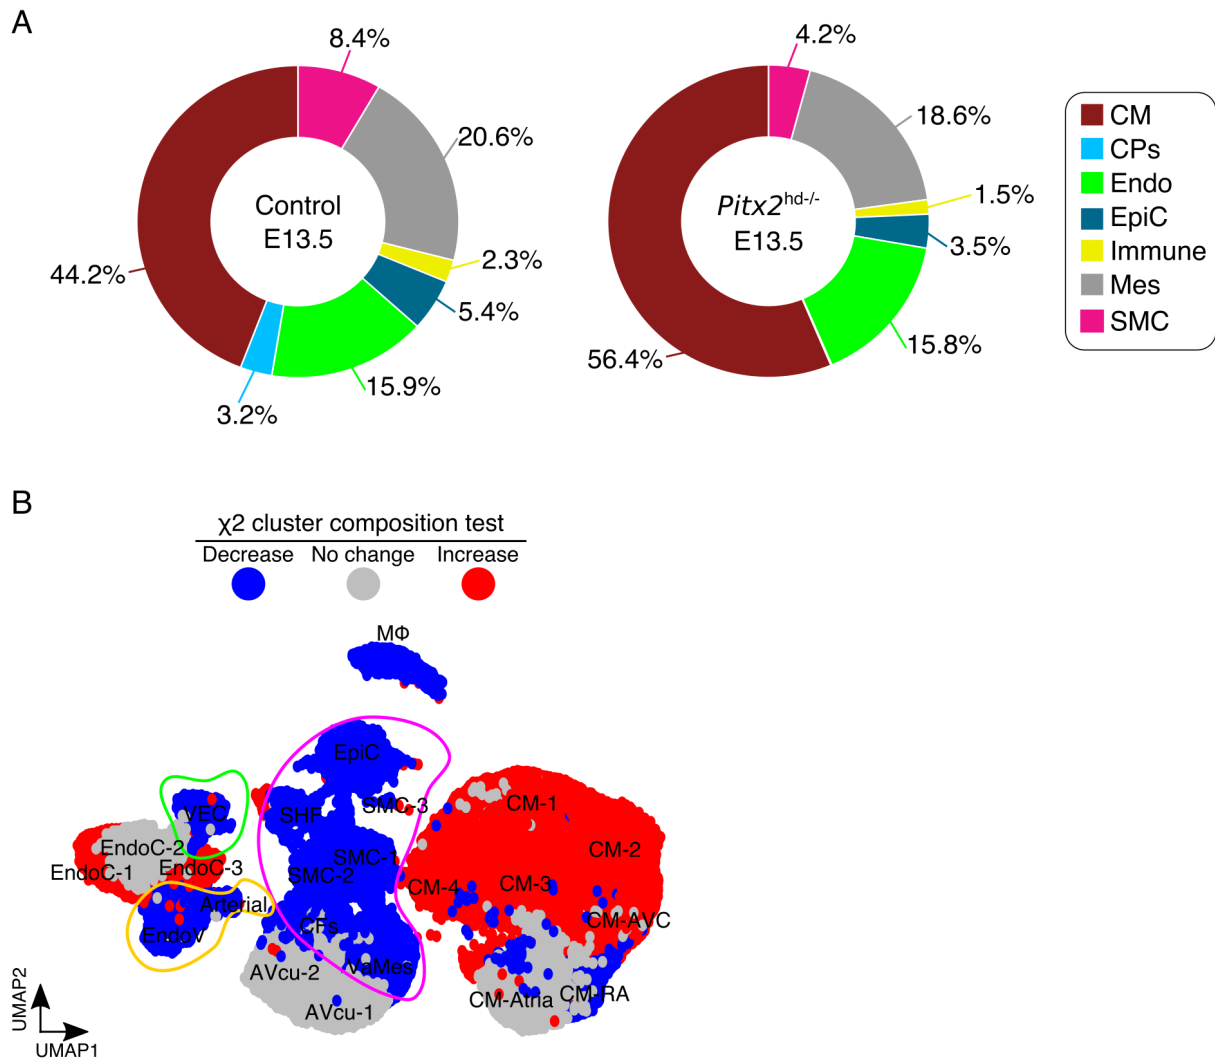

**Figure S4. Related to Figure 4, E13.5 Cardiac Composition.**

- A. Donut plots displaying the cell composition by major cell type at E13.5.
- B.  $\chi^2$  cluster composition analysis of subclustered E13.5 *Pitx2*-null cardiac tissue compared to control.

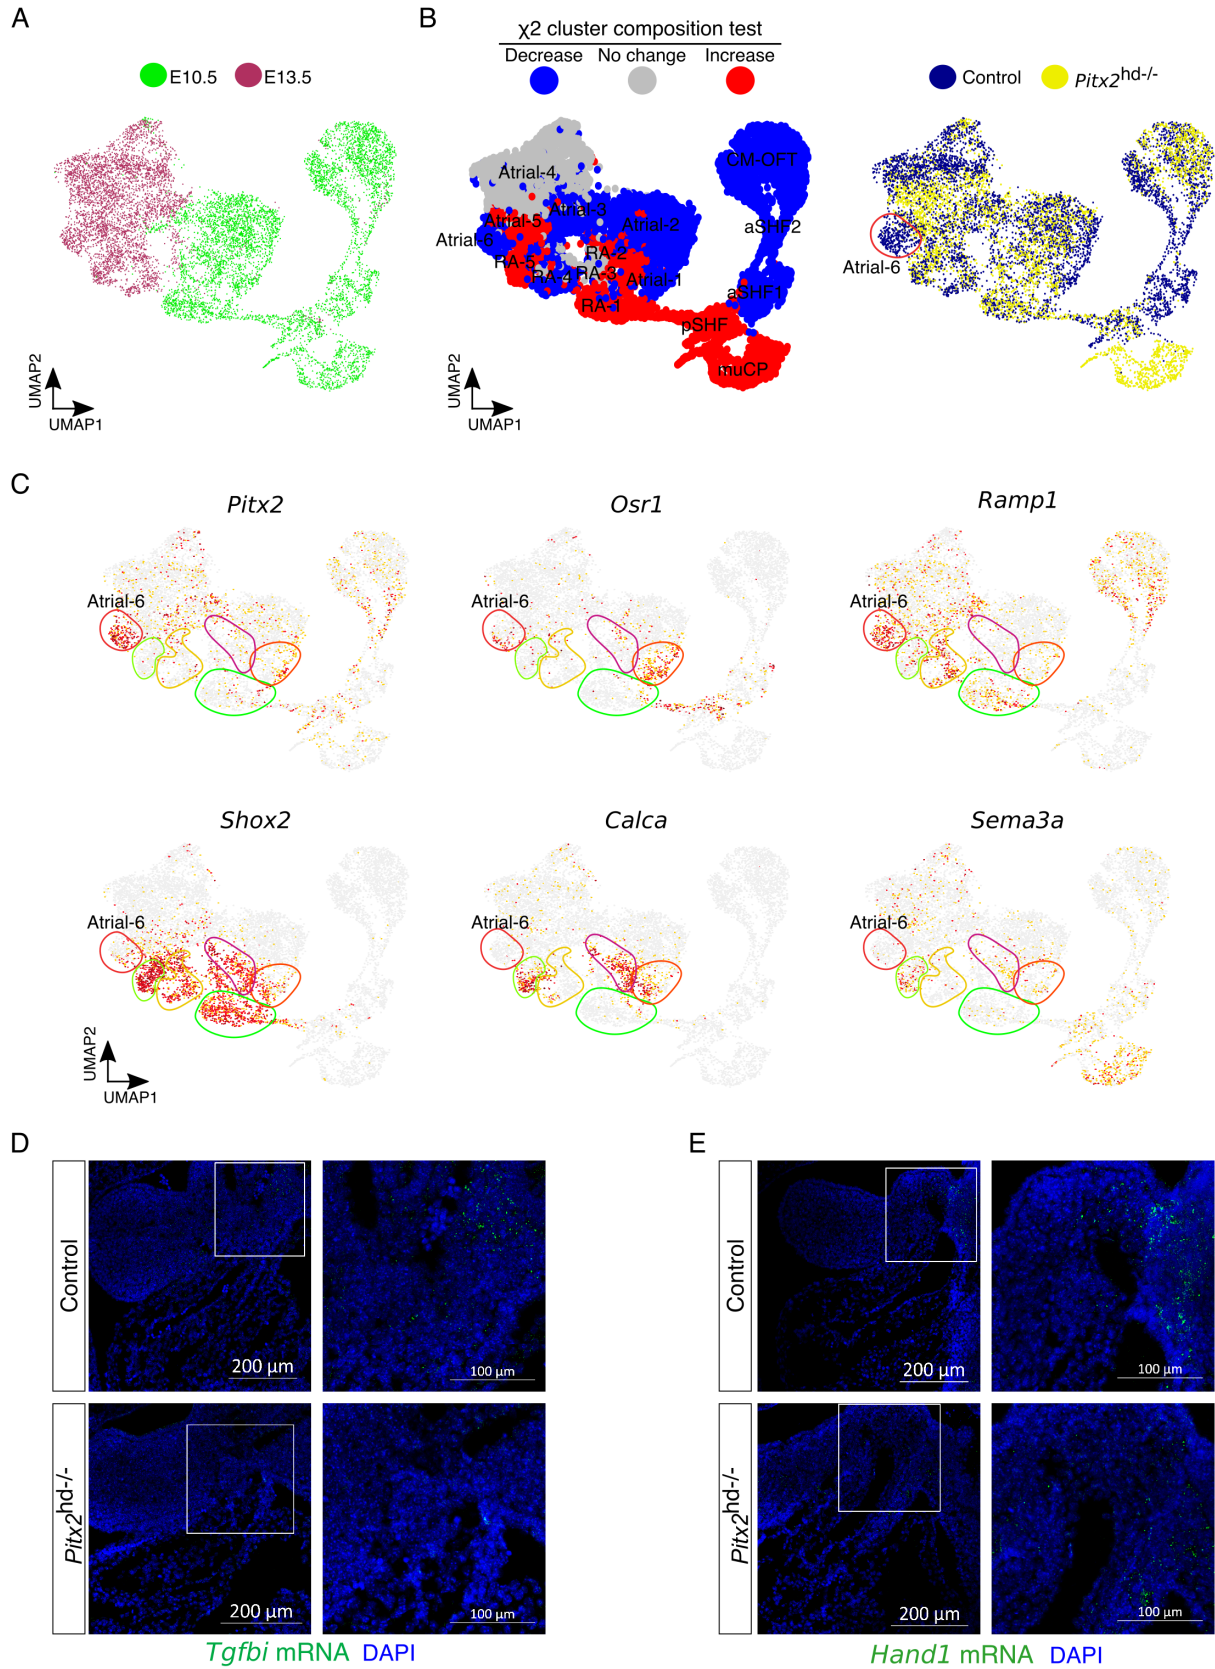

## Figure S5. Related to Figure 4, Atrial and Outflow Tract Cardiomyocyte Differentiation and Maturation.

- A. UMAP plot showing age of each individual cell. E10.5 cells are colored green, and E13.5 cells are highlighted in maroon.
- B. (left)  $\chi^2$  cluster composition analysis of subclustered *Pitx2*-null cardiac tissue compared to control. (right) UMAP plot colored by genotype.
- C. UMAP feature plots of gene expression. Highlighted cell clusters are highlighted and colored according to **Fig. 4A**.
- D. Replicates for *Tgfb1* (green) FISH labelling. Nuclei are stained blue (DAPI).
- E. Replicates for *Hand1*(green) FISH labelling. Nuclei are stained blue (DAPI).

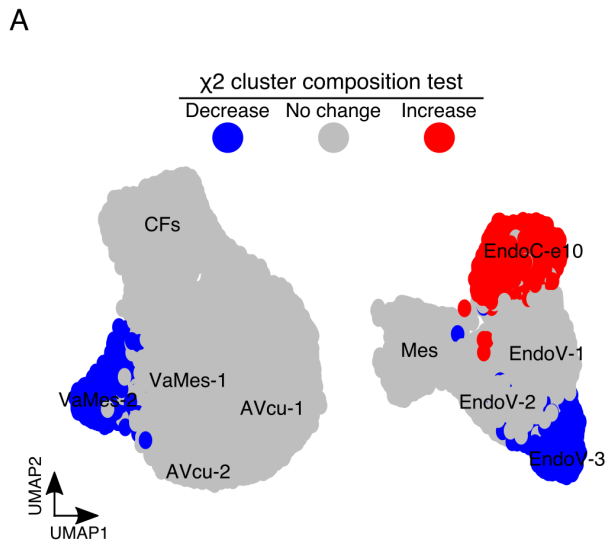

**Figure S6. Related to Figure 6, Cardiac Valve and Cushion Composition.**

- A.  $\chi^2$  cluster composition analysis of subclustered *Pitx2*-null cardiac tissue compared to control.



**Table S1.**

[Click here to Download Table S1](#)

**Table S2.**

[Click here to Download Table S2](#)

**Table S3.**

[Click here to Download Table S3](#)
